# Supplementary material for: A Process-Based Model of TCA Cycle Functioning to Analyze Citrate Accumulation in Pre- and Post-Harvest Fruits
Source: PubMed Central journal article supplement (PMC4456289; doi:10.1371/journal.pone.0126777), 2015-06-04
Supplement: pone.0126777.s005.pdf [file pone.0126777.s005.pdf]

**Table S1: description and units of parameters, constants and variables**

| Denomination                    | Description                                                                                               | Units                                                                |
|---------------------------------|-----------------------------------------------------------------------------------------------------------|----------------------------------------------------------------------|
| <b>Parameters and constants</b> |                                                                                                           |                                                                      |
| $C_m$                           | Maximum absolute growth rate of pulp dry weight                                                           | $\text{g day}^{-1}$                                                  |
| $C_{\text{pyr}_{\text{cyt}}}$   | Concentration of pyruvate in the pulp cytosolic compartment                                               | $\text{mmol L}^{-1}$                                                 |
| $C_{\text{mal}_{\text{cyt}}}$   | Concentration of malate in the pulp cytosolic compartment                                                 | $\text{mmol L}^{-1}$                                                 |
| $\text{DAE}_{\text{ref}}$       | Reference day after ethylene treatment                                                                    | day                                                                  |
| $f_{\text{NH}}$                 | Fraction of N used in growth that is assimilated heterotrophically                                        | dimensionless                                                        |
| $k_{i,g}$                       |                                                                                                           | $\text{L}^2 \text{day}^{-1} \text{mmol}^{-1}$ or $\text{L day}^{-1}$ |
| $K_{i,g}$                       |                                                                                                           | $\text{L day}^{-1}$                                                  |
| $k_{i,r}$                       | Parameter of the equations to calculate the rate constants and membrane permeabilities (Eq. 18-21)        | $\text{L}^2 \text{day}^{-1} \text{mmol}^{-1}$ or $\text{L day}^{-1}$ |
| $K_{i,r}$                       |                                                                                                           | $\text{L day}^{-1}$                                                  |
| $m_i$                           |                                                                                                           | dimensionless                                                        |
| $j_i$                           |                                                                                                           | dimensionless                                                        |
| $M_c$                           | Molar mass of carbon                                                                                      | $\text{g mol}^{-1}$                                                  |
| $q_{m1}$                        |                                                                                                           | $\text{mmol CO}_2 \text{g}^{-1} \text{day}^{-1}$                     |
| $q_{m2}$                        | Parameters of the equation to calculate the maintenance coefficient during post-harvest ripening (Eq. 28) | dimensionless                                                        |
| $q_{m3}$                        |                                                                                                           | dimensionless                                                        |
| $q_g$                           | Growth respiration coefficient                                                                            | $\text{mmol CO}_2 \text{g}^{-1}$                                     |
| $q_m$                           | Maintenance coefficient at 20 °C                                                                          | $\text{mmol CO}_2 \text{g}^{-1} \text{day}^{-1}$                     |
| $Q_{10}$                        | Temperature ratio of maintenance respiration                                                              | dimensionless                                                        |
| $r_T$                           | Added cost of translocating photosynthetates from sources to sink                                         | %                                                                    |
| $R_m$                           | Maximum relative growth rate of pulp dry weight                                                           | $\text{g g}^{-1} \text{day}^{-1}$                                    |
| $\text{SDW}_{\text{ref}}$       | Reference structural dry weight                                                                           | g                                                                    |
| $t_b$                           | x axis intercept of the linear growth phase of pulp dry weight                                            | day                                                                  |
| $\alpha$                        | Concentration of carbon in glucose                                                                        | dimensionless                                                        |
| <b>Variables</b>                |                                                                                                           |                                                                      |
| A                               | Ash concentration in the pulp                                                                             | $\text{g g DW}^{-1}$                                                 |
| C                               | Carbon concentration in the pulp                                                                          | $\text{g g DW}^{-1}$                                                 |

|                      |                                                                 |                                                                            |
|----------------------|-----------------------------------------------------------------|----------------------------------------------------------------------------|
| CC                   | Construction cost                                               | g glucose g <sup>-1</sup>                                                  |
| Ccit                 | Citrate concentration in the pulp                               | mmol 100g FW <sup>-1</sup>                                                 |
| Ccit <sub>mt</sub>   | Concentration of citrate in the pulp mitochondrial compartment  | mmol L <sup>-1</sup>                                                       |
| Ccit <sub>cyt</sub>  | Concentration of citrate in the pulp cytosolic compartment      | mmol L <sup>-1</sup>                                                       |
| Cmal <sub>mt</sub>   | Concentration of malate in the pulp mitochondrial compartment   | mmol L <sup>-1</sup>                                                       |
| Cpyr <sub>mt</sub>   | Concentration of pyruvate in the pulp mitochondrial compartment | mmol L <sup>-1</sup>                                                       |
| DAE                  | Day after ethylene treatment                                    | day                                                                        |
| DW                   | Pulp dry weight                                                 | g                                                                          |
| FW                   | Pulp fresh weight                                               | g                                                                          |
| k <sub>i,g</sub> (t) | Rate constant during fruit growth                               | L <sup>2</sup> day <sup>-1</sup> mmol <sup>-1</sup> or L day <sup>-1</sup> |
| k <sub>i,r</sub> (t) | Rate constant during fruit post-harvest ripening                | L <sup>2</sup> day <sup>-1</sup> mmol <sup>-1</sup> or L day <sup>-1</sup> |
| K <sub>i,g</sub> (t) | Membrane permeability during fruit growth                       | L day <sup>-1</sup>                                                        |
| K <sub>i,r</sub> (t) | Membrane permeability during fruit post-harvest ripening        | L day <sup>-1</sup>                                                        |
| MCit <sub>t0</sub>   | Initial citrate amount in the pulp                              | mmol fruit <sup>-1</sup>                                                   |
| Mcit <sub>mt</sub>   | Amount of citrate in the pulp mitochondrial compartment         | mmol                                                                       |
| Mmal <sub>mt</sub>   | Amount of malate in the pulp mitochondrial compartment          | mmol                                                                       |
| Mpyr <sub>mt</sub>   | Amount of pyruvate in the pulp mitochondrial compartment        | mmol                                                                       |
| N                    | Nitrogen concentration in the pulp                              | g g DW <sup>-1</sup>                                                       |
| Resp                 | Pulp respiration                                                | mmol day <sup>-1</sup>                                                     |
| SDW                  | Pulp structural dry weight                                      | g                                                                          |
| φ <sub>i</sub>       | Metabolic fluxes of the TCA cycle                               | mmol day <sup>-1</sup>                                                     |
| θ                    | Air temperature                                                 | °C                                                                         |
