# Supplementary material for: A Process-Based Model of TCA Cycle Functioning to Analyze Citrate Accumulation in Pre- and Post-Harvest Fruits
Source: PubMed Central journal article supplement (PMC4456289; doi:10.1371/journal.pone.0126777), 2015-06-04
Supplement: pone.0126777.s007.pdf [file pone.0126777.s007.pdf]

**Table S3 LMM analysis of predicted and measured citrate concentration (g 100 g FW<sup>-1</sup>) during postharvest fruit ripening.** The factors studied were ripening stage, fruit age at harvest, cultivars and pruning treatment in the 2011 experiment, and ripening stage, cultivars and potassium fertilization treatment in the 2012 experiment.

| F-value <sup>a</sup> and significance <sup>b</sup> |                |                                 |                                |
|----------------------------------------------------|----------------|---------------------------------|--------------------------------|
| Year                                               | Factors        | Predicted citrate concentration | Measured citrate concentration |
| 2011                                               |                |                                 |                                |
|                                                    | c              | 517***                          | 496***                         |
|                                                    | p              | Ns                              | Ns                             |
|                                                    | a              | Ns                              | 23***                          |
|                                                    | r              | 241***                          | 21***                          |
|                                                    | r <sup>2</sup> | 36***                           | 45***                          |
|                                                    | r <sup>3</sup> | 6*                              | 5*                             |
|                                                    | p : r          | 10**                            | Ns                             |
|                                                    | a : c          | 15***                           | Ns                             |
|                                                    | a : r          | 21***                           | Ns                             |
|                                                    | c : r          | 1204***                         | 212***                         |
|                                                    | p : a          | Ns                              | Ns                             |
|                                                    | p : c          | Ns                              | Ns                             |
|                                                    | a:c:r          | 35***                           | Ns                             |
|                                                    | p : a : c      | Ns                              | Ns                             |
|                                                    | p:a:r          | Ns                              | Ns                             |
|                                                    | p:a:c:r        | Ns                              | Ns                             |
| 2012                                               |                |                                 |                                |
|                                                    | c              | 147***                          | 252***                         |
|                                                    | f              | Ns                              | Ns                             |
|                                                    | r              | 106***                          | 6*                             |
|                                                    | r <sup>2</sup> | 20***                           | 29***                          |
|                                                    | r <sup>3</sup> | 7**                             | Ns                             |
|                                                    | c : f          | 6**                             | Ns                             |
|                                                    | c : r          | 564***                          | 104***                         |
|                                                    | f : r          | Ns                              | Ns                             |
|                                                    | c : f : r      | Ns                              | Ns                             |

<sup>a</sup> The F-value is given only for the factors retained from the optimal model.

<sup>b</sup> \*\*\* p-value < 0.001; \*\* p-value < 0.01; \* p-value < 0.05 ; Ns : not significant.

<sup>c</sup> Codes for factors: c=cultivar; p=pruning treatment; a=fruit age at harvest; r=ripening stage; f=potassium fertilization treatment.
