# Supplementary material for: A Process-Based Model of TCA Cycle Functioning to Analyze Citrate Accumulation in Pre- and Post-Harvest Fruits
Source: PubMed Central journal article supplement (PMC4456289; doi:10.1371/journal.pone.0126777), 2015-06-04
Supplement: pone.0126777.s008.pdf [file pone.0126777.s008.pdf]

**Table S4 Estimated parameter values and standard errors (in parentheses) of the exponential growth model of pulp dry weight for the three cultivars (IDN, PJB, and PL) and two contrasted fruit loads (LL: low fruit load; HL: high fruit load) in 2011.**

| Cultivar | Fruit load | $C_m$<br>(g day <sup>-1</sup> ) | $R_m$<br>(g g <sup>-1</sup> day <sup>-1</sup> ) | $t_b$<br>(day) |
|----------|------------|---------------------------------|-------------------------------------------------|----------------|
| IDN      | LL         | 0.34 (0.02)                     | 0.11 (0.03)                                     | 30.1 (2.4)     |
| IDN      | HL         | 0.28(0.02)                      | 0.11 (0.04)                                     | 29.7 (3.7)     |
| JB       | LL         | 0.54 (0.03)                     | 0.11 (0.03)                                     | 36.1 (3.0)     |
| JB       | HL         | 0.40 (0.02)                     | 0.13 (0.04)                                     | 30.4 (2.6)     |
| PL       | LL         | 0.36 (0.02)                     | 0.11 (0.03)                                     | 29.9 (2.7)     |
| PL       | HL         | 0.32 (0.02)                     | 0.12 (0.04)                                     | 30.92 (3.4)    |
